# Supplementary material
Source: HighWire-hosted journal article supplement (https://www.life-science-alliance.org/content/6/5/e202201825/F1)

Source Data: Figure 1 E: blot 1

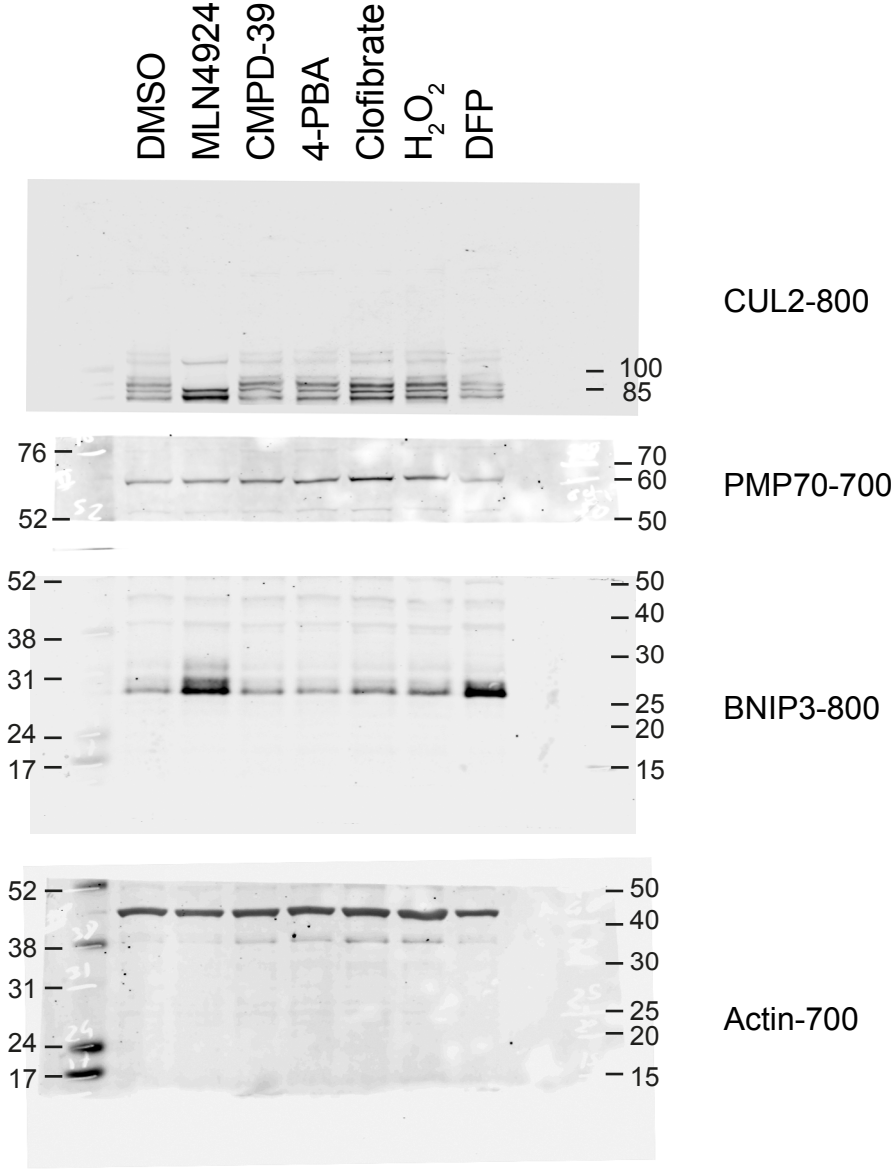

Source Data: Figure 1 E: blot 2

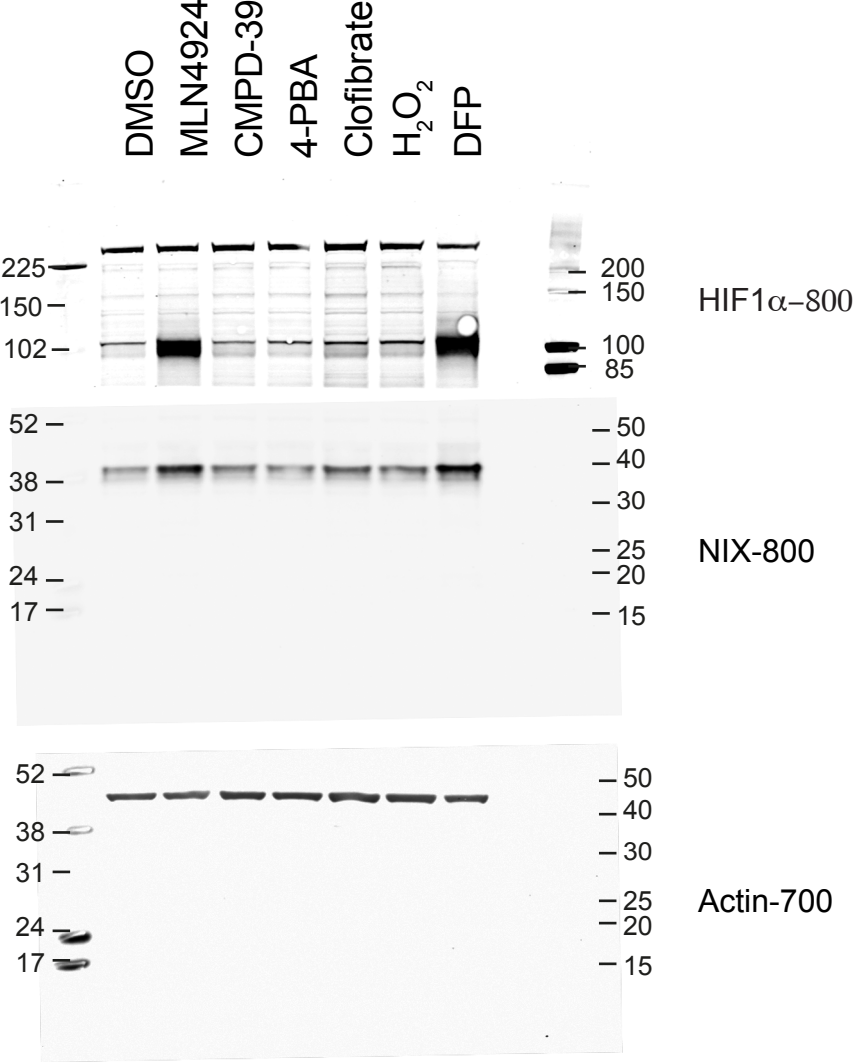

Source Data: Figure 1 E: blot 3

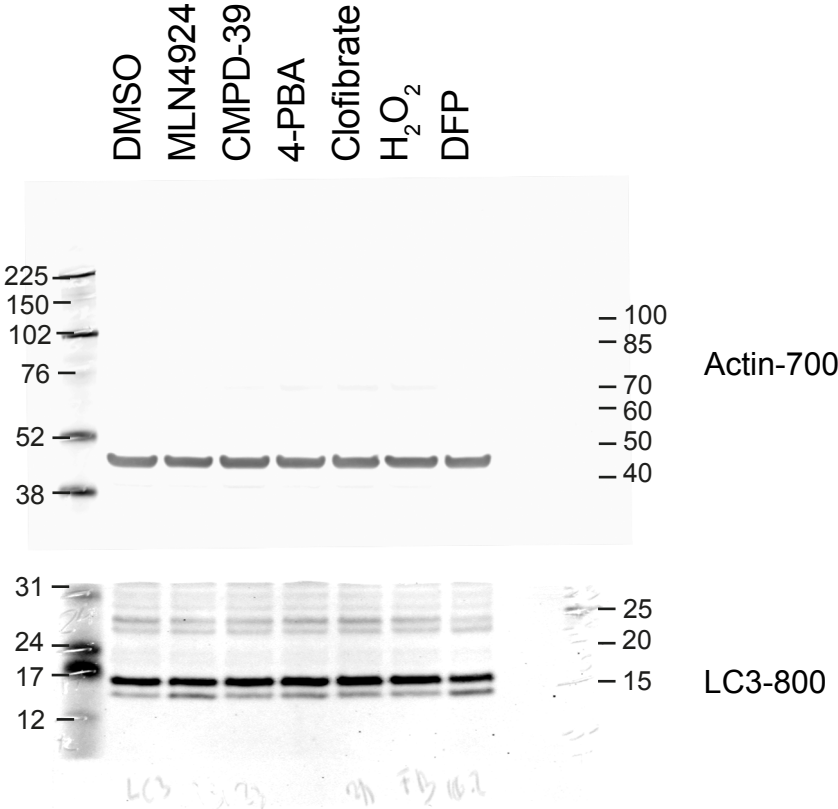

Supplement: inline-supplementary-material-1 [file inline-supplementary-material-1.pdf]
